# Supplementary material for: A Retrospective Study of the Proportion of Women at High and Low Risk of Intrauterine Infection Meeting Sepsis Criteria
Source: MDPI journal article supplement (doi:10.3390/microorganisms10010082), 2021-12-31
Supplement: s1 [file s1]

**Table S1.** Comparison of subjects included in study versus subjects excluded due to missing data.

|                                | PPROM                                |                                    |          | CONTROL                               |                                     |          |
|--------------------------------|--------------------------------------|------------------------------------|----------|---------------------------------------|-------------------------------------|----------|
|                                | Included cases<br><i>n</i> = 453 (%) | Missing data <i>n</i><br>= 132 (%) | <i>p</i> | Included cases<br><i>n</i> = 2004 (%) | Missing data <i>n</i><br>= 1155 (%) | <i>p</i> |
| Maternal age (mean ± CI)       | 31.5                                 | 31.2                               | 0.650    | 33.8                                  | 33.4                                | 0.030    |
| >35 year                       | 127 (28)                             | 36 (27.3)                          | 0.860    | 749 (37.4)                            | 420 (36.4)                          | 0.552    |
| Completed secondary education  | 411 (90.7)                           | 127 (96.2)                         | 0.100    | 1934 (96.5)                           | 1123 (97.2)                         | 0.534    |
| Gestation number (mean ± CI)   | 3.2                                  | 3.2                                | 0.890    | 3.9                                   | 3.7                                 | 0.039    |
| Previous cesareans (mean ± CI) | 0.4                                  | 0.4                                | 0.930    | 1.1                                   | 0.9                                 | 0.001    |
| In vitro fertilization         | 126 (27.8)                           | 31 (23.8)                          | 0.320    | 319 (15.9)                            | 170 (14.7)                          | 0.369    |
| Gestational diabetes           | 46 (10.2)                            | 10 (7.6)                           | 0.380    | 269 (13.4)                            | 154 (13.3)                          | 0.943    |
| Hypertension                   | 18 (4)                               | 8 (6.1)                            | 0.310    | 68 (3.4)                              | 59 (5.1)                            | 0.022    |

PPROM: preterm premature rupture of membranes; CI: confidence interval.

**Table S2.** Subjects with missing vital signs.

| Parameter |             | PPROM <i>n</i> = 585 (%) | Control <i>n</i> = 3159 (%) |
|-----------|-------------|--------------------------|-----------------------------|
| Admission | MAP         | 57 (9.7)                 | 129 (4.1)                   |
|           | Pulse       | 67 (11.5)                | 123 (3.9)                   |
|           | Temperature | 105 (17.9)               | 322 (10.2)                  |
| POD 0     | MAP         | 3 (0.5)                  | 345 (10.9)                  |
|           | Pulse       | 2 (0.3)                  | 286 (9.1)                   |
|           | Temperature | 101 (17.3)               | 2629 (83.2)                 |
| POD 1     | MAP         | 2 (0.3)                  | 247 (7.8)                   |
|           | Pulse       | 2 (0.3)                  | 41 (1.3)                    |
|           | Temperature | 4 (0.7)                  | 127 (4)                     |
| POD 2     | MAP         | 9 (1.5)                  | 239 (7.6)                   |
|           | Pulse       | 12 (2.1)                 | 183 (5.8)                   |
|           | Temperature | 4 (0.7)                  | 76 (2.4)                    |

PPROM: preterm premature rupture of membranes; POD: post-operation day; MAP: mean arterial pressure.

**Table S3.** Sensitivity analysis – urinary cultures. PPRM: preterm premature rupture of membranes.

|                                                 | <b>PPROM <i>n</i> =<br/>453 (%)</b> | <b>Control <i>n</i> =<br/>2004 (%)</b> | <i>p</i> -value |
|-------------------------------------------------|-------------------------------------|----------------------------------------|-----------------|
| Positive cultures<br>if missing are<br>positive | 64 (14.1)                           | 60 (3)                                 | <0.001          |
| Positive cultures<br>if missing are<br>negative | 25 (5.5)                            | 60 (3)                                 | 0.008           |
